# Supplementary material
Source: Springer Nature journal article supplement (https://www.springermedizin.de/resource/supplementary/13550_2013_178_MOESM4_ESM.pdf/9687754)

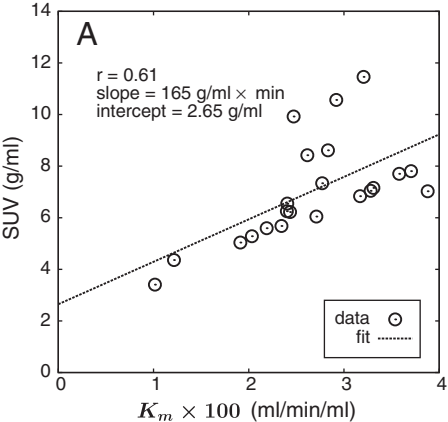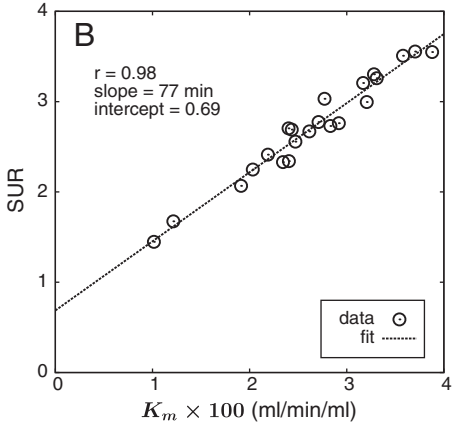

Supplement: MOESM4 [file 9687754]
